# Supplementary material
Source: PubMed Central journal article supplement (PMC7198692)
Supplement: 12250_2019_178_MOESM1_ESM.pdf [file 12250_2019_178_MOESM1_ESM.pdf]

## Electronic Supplementary Material

### Endosomes and Microtubules are Required for Productive Infection in Aquareovirus

Fuxian Zhang<sup>1,2</sup>, Hong Guo<sup>1</sup>, Qingxiu Chen<sup>1</sup>, Zheng Ruan<sup>2</sup>, Qin Fang<sup>1</sup>✉

1. State Key Laboratory of Virology, Wuhan Institute of Virology, Chinese Academy of Sciences, Wuhan 430071, China
2. Wuhan Center for Animal Diseases Prevention and Control, Wuhan 430071, China

Supporting information to DOI: 10.1007/s12250-019-00178-1

**Movie S1.** Real-time tracking of QD-labeled GCRVs internalization into live cell. Purified QD-bio-GCRVs were added to the CIK cells directly for dynamic tracking at 28 °C without a pre-binding process at 4 °C, and immediately recorded by the laser confocal microscope. The QD-labeled viruses (red) attached to cell membrane and then entered into the cytoplasm. And the complete internalization process of a single virus into a live cell can be observed. More red fluorescence was observed in the cytoplasm. Scale bars: 11 μm.

**Movie S2.** QD-bio-GCRV moving in CIK cell treated with CQ. CIK cells were incubated with CQ (25 μmol/L) prior to exposure to the QD-bio-GCRV. After pretreatment, CIK cells were infected with QD-bio-GCRVs for 30 min at 4 °C for synchronization and then placed at 28 °C in the presence of the drug for real-time tracking. Dynamic video was recorded using the confocal microscope. Movie from the time-sequence images showed that CQ significantly block the uptake of GCRVs in the cells treated with the inhibitor, and QD-bio-GCRVs were trapped on the cell surface. Scale bars: 11 μm.

**Movie S3.** QD-bio-GCRV traveling along microtubule. After a 24 h post-transfection with pGFP-MAP4, CIK cells were incubated with QD-bio-GCRVs for 30 min then placed at 28 °C for real-time tracking. Live cell images were captured using time-lapse confocal fluorescence microscopy. Real-time tracking showed that GCRV particles (red) co-localized with microtubules (green), and transported along microtubules in the CIK cell. Scale bars: 5 μm.
